# Supplementary material for: Exploring family based immigrant youth substance use prevention programmes: a scoping review protocol
Source: PubMed Central journal article supplement — BMJ Open. 2021 May 26;11(5):e046766. doi: 10.1136/bmjopen-2020-046766 (PMC8160161; doi:10.1136/bmjopen-2020-046766), 2021-05-26
Supplement: bmjopen-2020-046766.draft_revisions.pdf [file bmjopen-2020-046766.draft_revisions.pdf]

# BMJ Open

BMJ Open is committed to open peer review. As part of this commitment we make the peer review history of every article we publish publicly available.

When an article is published we post the peer reviewers' comments and the authors' responses online. We also post the versions of the paper that were used during peer review. These are the versions that the peer review comments apply to.

The versions of the paper that follow are the versions that were submitted during the peer review process. They are not the versions of record or the final published versions. They should not be cited or distributed as the published version of this manuscript.

BMJ Open is an open access journal and the full, final, typeset and author-corrected version of record of the manuscript is available on our site with no access controls, subscription charges or pay-per-view fees (<http://bmjopen.bmj.com>).

If you have any questions on BMJ Open's open peer review process please email [info.bmjopen@bmj.com](mailto:info.bmjopen@bmj.com)

# BMJ Open

## Exploring family-based immigrant youth substance use prevention programs: A scoping review protocol

|                               |                                                                                                                                                                                                                                                    |
|-------------------------------|----------------------------------------------------------------------------------------------------------------------------------------------------------------------------------------------------------------------------------------------------|
| Journal:                      | <i>BMJ Open</i>                                                                                                                                                                                                                                    |
| Manuscript ID                 | bmjopen-2020-046766                                                                                                                                                                                                                                |
| Article Type:                 | Protocol                                                                                                                                                                                                                                           |
| Date Submitted by the Author: | 09-Nov-2020                                                                                                                                                                                                                                        |
| Complete List of Authors:     | Li, Yiyang; University of Saskatchewan<br>Maina , Geoffrey; University of Saskatchewan,<br>Pandey, Mamata; Saskatchewan Health Authority<br>Amoyaw, Jonathan; Dalhousie University<br>Fang, Yiting; University of Saskatchewan, College of Nursing |
| Keywords:                     | Substance misuse < PSYCHIATRY, PUBLIC HEALTH, Community child health < PAEDIATRICS                                                                                                                                                                 |
|                               |                                                                                                                                                                                                                                                    |

SCHOLARONE™  
Manuscripts

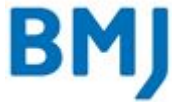

I, the Submitting Author has the right to grant and does grant on behalf of all authors of the Work (as defined in the below author licence), an exclusive licence and/or a non-exclusive licence for contributions from authors who are: i) UK Crown employees; ii) where BMJ has agreed a CC-BY licence shall apply, and/or iii) in accordance with the terms applicable for US Federal Government officers or employees acting as part of their official duties; on a worldwide, perpetual, irrevocable, royalty-free basis to BMJ Publishing Group Ltd ("BMJ") its licensees and where the relevant Journal is co-owned by BMJ to the co-owners of the Journal, to publish the Work in this journal and any other BMJ products and to exploit all rights, as set out in our [licence](#).

The Submitting Author accepts and understands that any supply made under these terms is made by BMJ to the Submitting Author unless you are acting as an employee on behalf of your employer or a postgraduate student of an affiliated institution which is paying any applicable article publishing charge ("APC") for Open Access articles. Where the Submitting Author wishes to make the Work available on an Open Access basis (and intends to pay the relevant APC), the terms of reuse of such Open Access shall be governed by a Creative Commons licence – details of these licences and which [Creative Commons](#) licence will apply to this Work are set out in our licence referred to above.

Other than as permitted in any relevant BMJ Author's Self Archiving Policies, I confirm this Work has not been accepted for publication elsewhere, is not being considered for publication elsewhere and does not duplicate material already published. I confirm all authors consent to publication of this Work and authorise the granting of this licence.

1  
2  
3 **Exploring family-based immigrant youth substance use prevention programs: A**  
4 **scoping review protocol**  
5  
6

7 **Authors**

8 **Corresponding author, first author:**

9 Yiyang Li, PhD  
10 Postdoctoral Fellow,  
11 College of Nursing, Prince Albert Campus  
12 University of Saskatchewan  
13 244 1061 Central Avenue  
14 Prince Albert, SK, S6V 4T1, Canada  
15 Email: yiyang.li@usask.ca  
16 Tel: 306-881-5413  
17  
18

19 **Co-author:**

20 Geoffrey Maina, R.N. PhD.  
21 Assistant Professor,  
22 College of Nursing, Prince Albert Campus,  
23 University of Saskatchewan  
24 Office 173, 130 1061 Central Avenue  
25 Prince Albert, SK, S6V 4V4, Canada  
26 Email: geoffrey.maina@usask.ca  
27 Tel: 306-765-3887  
28  
29

30  
31 **Co-author:**

32 Mamata Pandey, PhD.  
33 Research Scientist, Saskatchewan Health Authority  
34 1801 Toronto Street, Regina, SK, S4P 1M7, Canada  
35 Email: mamata.pandey@saskhealthauthority.ca  
36 Tel: 306-520-3321  
37  
38

39 **Co-author:**

40 Jonathan Amoyaw, PhD.  
41 Assistant Professor,  
42 Department of Sociology and Social Anthropology,  
43 Dalhousie University  
44 McCain Building, 6135 University Avenue PO Box 15000,  
45 Halifax, NS, B3H 4R2, Canada  
46 Email: jonathan.amoyaw@dal.ca  
47 Tel: 519-280-5827  
48  
49

50 **Co-author:**

51 Yiting Fang, Master student  
52 College of Nursing, Prince Albert Campus,  
53 University of Saskatchewan, Canada  
54 138 - 1061 Central Avenue  
55  
56  
57  
58  
59  
60

1  
2  
3  
4  
5  
6  
7  
8  
9  
10  
11  
12  
13  
14  
15  
16  
17  
18  
19  
20  
21  
22  
23  
24  
25  
26  
27  
28  
29  
30  
31  
32  
33  
34  
35  
36  
37  
38  
39  
40  
41  
42  
43  
44  
45  
46  
47  
48  
49  
50  
51  
52  
53  
54  
55  
56  
57  
58  
59  
60

Prince Albert, SK, S6V 4V4  
Email: yif244@mail.usask.ca

**Word Count: 3,226 (exclude the title page, references and figures)**

For peer review only

## Exploring family-based immigrant youth substance use prevention programs: A scoping review protocol

### Abstract

**Introduction:** Canada has one of the highest rates of problematic opiate and alcohol use in the world. It was also the second country in the world to legalize marijuana for recreational use. As Canada is an immigrant-receiving country, newcomers and immigrants contend with a substance use landscape that was likely absent in their countries of origin. Although immigrants have lower rates of substance use than the host population, the risk of substance use, especially among youth, increases with acculturation and peer pressure. While parents are best placed to mitigate the risks for substance use among their youth, immigrant parents often do not have the knowledge and skills to do so. Therefore, culturally adaptable family-based interventions must be explored to build immigrant parents' capacities to mitigate substance use risks.

**Aim and purpose:** The aim of this scoping review is to explore family-based substance use prevention interventions for immigrant youth, which will be guided by two questions:

1. What is known about family-based interventions for preventing immigrant adolescents' substance use?
2. What are the characteristics and outcomes of these intervention protocols?

**Methods and analysis:** We will apply Arksey and O'Malley's procedure for reporting scoping review and report study findings based on the PRISMA guidelines for scoping reviews.

**Discussion:** We hope that the knowledge translation emanating from this review will increase immigrant parents' knowledge of substance use and enable them to effectively intervene to prevent substance use among their youth. We also hope that this work can inform policy development on best practices for substance use prevention and for the creation of culturally sensitive programs and services for immigrant youth.

**Keywords:** Public Health; Family Relations; Emigrants and Immigrant; Substance-Related Disorders

### Strengths and limitations of this study

1. This study will provide insights into family-focused substance use prevention interventions for immigrant youth that can be adapted and applied to a local setting.
2. This study will help reorient the role of families in substance use prevention and identify strategies that may help families play that role.
3. The scoping review is limited to family-based, immigrant-focused substance use interventions that are published in English.

1  
2  
3  
4  
5  
6  
7  
8  
9  
10  
11  
12  
13  
14  
15  
16  
17  
18  
19  
20  
21  
22  
23  
24  
25  
26  
27  
28  
29  
30  
31  
32  
33  
34  
35  
36  
37  
38  
39  
40  
41  
42  
43  
44  
45  
46  
47  
48  
49  
50  
51  
52  
53  
54  
55  
56  
57  
58  
59  
60

- 4. The exclusion of interventions that do not target immigrants may limit the research by excluding relevant programs that may be applicable to the population of interest.

For peer review only

## Background

The use of both licit and illicit substances is a growing problem in Canada. Canada has the second-highest consumption of prescription opioids in the world caused by the over-prescription of these strong analgesics.[1] This over-prescription causes opioid use disorder, a problematic pattern of opioid use that leads to clinically significant impairment or distress and that impacts people's qualities of life, occupations and relationships.[2] In 2017, a total of 21.3 million prescriptions for opioids were dispensed in Canada.[3] However, street drugs contaminated by fentanyl have increased opioid overdoses and opioid-related deaths in Canada.[4] In 2019, 12 people were hospitalized each day on average due to opioid poisoning, and 3,823 opioid-related deaths were reported.[5]

Canada also has one of the highest per capita alcohol consumptions worldwide. In 2018, Canadians consumed 8.2 litres of alcohol per capita, spending more than \$756 per household on alcohol.[6] Alcohol use among children in grades 7 to 12 is high, with 44% reporting alcohol consumption in 2018.[6] In 2017, alcohol-related hospitalization was higher than hospitalization for heart attacks at 249 per 100,000 and 243 per 100,000, respectively.[6]

In 2018, Canada became the second country to legalize cannabis,[7], which is the second-most used substance in Canada.[8] In 2019, more than 5.1 million Canadians reported having used cannabis in the past three months.[9] In the third quarter of 2019, about 26% of adolescents and young adults (aged 15–24) reported having used cannabis, [10] while 18% of students (about 374,000) in grades 7 to 12 reported using cannabis in 2018–2019.[11] Adolescents' cannabis use is associated with an increased risk of mental health illnesses, poor academic outcomes and personal disadvantages.[9] Methamphetamine use is also prevalent among youth and young adults, with 1.2% of Canadian students in grades 7 to 12 reporting using it in 2015.[12]

In 2017, substance use and addiction contributed \$13.1 billion in healthcare costs and led to more than 175,000 hospitalizations and about 75,000 deaths in Canada.[13] Moreover, problematic substance use was associated with an estimated \$20 billion in lost productivity in 2017.[13] From 2015 to 2017, the per-person cost of substance use has increased from \$1,218 to \$1,258.[13]

Canada is a popular destination for international migration, and immigrants have become an important driver of population and economic growth. The 2016 Census showed that immigrants accounted for 21.9% of the Canadian population.[14] International students and visitors contributed \$31 billion to Canada's economic growth in 2016-2017.[15] In 2017–2018, 80% of Canada's population growth was driven by international immigrants, and in 2019, 313,580 new immigrants landed in Canada.[16, 17] Immigrants to Canada are expected to assimilate into Canadian culture. The prevailing socio-cultural climate of the destination country can impact how immigrants and newcomers acculturate themselves. One of the realities that immigrants are confronted with is the perversity of substances that may not be available or legal in their countries of origin. Generally, compared to native Canadians, new immigrants are less likely to experiment with substances; however, their risk of substance use increases with their length of stay.[18] Immigrants adapt to a new culture by speaking the local language and adopting cultural beliefs, values, attitudes and behaviors, including those that are deemed risky.[19, 20]



1  
2  
3  
4  
5  
6  
7  
8  
9  
10  
11  
12  
13  
14  
15  
16  
17  
18  
19  
20  
21  
22  
23  
24  
25  
26  
27  
28  
29  
30  
31  
32  
33  
34  
35  
36  
37  
38  
39  
40  
41  
42  
43  
44  
45  
46  
47  
48  
49  
50  
51  
52  
53  
54  
55  
56  
57  
58  
59  
60

Immigrants' attitudes towards substances may be informed by their exposure to, their experience of, and the acceptability of those substances in their country of origin. For instance, immigrants who come from countries where plant products are commonly used are more likely to accept cannabis than those who do not.[21, 22] Similarly, since alcohol and marijuana are easily accessible and socially acceptable substances in Canada, immigrants without prior exposure to them may be inclined to start using them for recreation purposes.[23] Moreover, immigrants' risk for substance use might be aggravated by immigration-related stress, which increases the risk of developing mental health illnesses.[24] Thus, new immigrants may use substances as a maladaptive coping mechanism to deal with stress induced by immigration and resettlement processes.

Generally, immigrant youth in Canada have a significantly lower level of substance use than their Canadian counterparts. According to Hamilton et al.,[25], 13% of first-generation immigrant youth residing in Ontario reported using cannabis before, while 9.8% drink alcohol regularly. In the same research, 22.6% of second-generation immigrant adolescents reported having used cannabis, and 16.8% consumed alcohol regularly.[25] The acculturation process has been cited as a risk factor for the initiation of substance use among immigrant youth.[21, 26] Immigrant youth may feel pressured to conform to the practices of their receiving country and feel the need to belong with their peers, who may introduce them to substances.[21, 26, 27]

Due to the increased risk of substance use among immigrant youth in Canada, the research team, who themselves are first-generation immigrants, identified a need to equip parents, guardians and caregivers with skills to mitigate this risk. Consultations with service providers at an immigrant settlement agency in a mid-sized prairie city in Canada revealed that most immigrants and newcomers, especially those with limited English language proficiency, need help to build capacity to a) understand substance use trends and the risks that their children may face; b) detect early signs of substance use among youth; c) find available resources to mitigate the risks and learn skills to support their youth; and d) learn family-based intervention strategies to mitigate youth's potential substance use initiation. Significant empirical evidence demonstrates that effective parenting, characterized by parental warmth and close supervision of children, can delay or prevent substance use initiation.[27-29] In addition, parents' zero tolerance of and clear rules about substance use can prevent substance use initiation.[29-31]

Family-based substance use prevention programs for immigrant youth need to be culturally safe and able to equip parents with effective strategies that can help their youth manage risks for substance use.[32, 33] These programs can be conducted in group settings with active family participation to help foster understanding between family members to support youth at risk of substance use.[34, 35] They may entail interventions that simultaneously engage parents and teenagers in the same or different programs or can take a curriculum-based approach where the learning activities are organized in modules.[29] Role playing, discussion groups and videos help participants to integrate and apply lessons learned, improve communication and identify obstacles that parents may encounter in supporting youth and preventing substance use.[29, 36]

A good family-based substance use prevention program for immigrant youth must consider skills and behavioral and cultural factors when developing or adapting it.[37] These include understanding language limitations, the acculturation process, and the

1  
2  
3 available support systems. It also needs to highlight family's role in protecting and  
4 supporting youth in the acculturation process.[38]  
5

### 6 7 **Aim and purpose**

8 The aim of this review is to explore the types and characteristics of family-based  
9 substance use prevention interventions for immigrant youth. The purpose of this project  
10 is to identify and describe family-based substance use prevention interventions that could  
11 potentially be adapted to support immigrant families in mitigating the risk of substance  
12 use initiation facing youth.  
13

### 14 15 **Methods**

16 We will conduct a scoping review of family-based substance use prevention  
17 programs for immigrant youth to identify and describe these interventions. A scoping  
18 literature review focuses on an under-researched or complex research area and seeks to  
19 summarize key concepts, principles, main sources and evidence under that topic.[39] This  
20 scoping review will be guided by community-based research principles, a collaborative,  
21 equal partnership between researchers and community members during the research  
22 process.[37, 40, 41] We will depend on stakeholders within the immigrant community to  
23 identify and refine the research problem, develop an appropriate knowledge translation  
24 tool and thereafter seek mechanisms for developing a culturally appropriate intervention  
25 for immigrant families.[41] This scoping review will begin with the formation of the  
26 community advisory council (CAC) comprising of people who provide and access  
27 settlement services for newcomers and immigrants. Potential members of the CAC  
28 include social service providers, health care providers and recent newcomers and  
29 immigrants. This CAC will meet with the research team to advise them throughout the  
30 review. The scoping review will be guided by Arksey and O'Malley's [42] steps of  
31 conducting a scoping review, which are outlined below.  
32

33  
34 **Step 1: Identify the research question:** The CAC will assist in formulating the  
35 search terms, which will be used to develop the research question. Before embarking on  
36 the scoping review process, a search will be conducted on PubMed, Web of Science and  
37 Prospero to ensure that no such scoping review has been done. The scoping review will  
38 be guided by two broad research questions: 1) what is known about family-based  
39 interventions for preventing immigrant youth's substance use? and 2) what are the  
40 characteristics and outcomes of these intervention protocols?  
41

42 **Step 2: Identify relevant studies:** The research team, with the help of a health  
43 sciences librarian, will develop a strategy to search for published articles and grey  
44 literature. A concept map based on the following keywords will be developed to guide  
45 the search for relevant publications: "family," "prevention," "immigration," "youth,"  
46 "substance use" and types of substances. Appendix 1 shows a prototype of a concept map  
47 that will be improved on to guide the review. A test search on MEDLINE will be  
48 conducted to assess its feasibility. Thereafter, the following databases will be searched  
49 for relevant studies: Ovid MEDLINE, 1946 to present; CINAHL (EBSCO); EMBASE,  
50 1947 to present; Web of Science, 1900 to present; and APA PsycInfo, 1806 to present.  
51 For this scoping review, only literature published from 2010 to 2020 will be included. All  
52 relevant studies will be downloaded and saved in Mendeley, a reference management  
53 software, and all duplicate references will be removed. Then, all selected literature will  
54  
55  
56  
57

1  
2  
3 be input in Covidence, a systematic review management software. Besides searching  
4 literature in databases, grey literature will also be included in this scoping review. The  
5 research team will search for grey literature from Canadian organizations related to  
6 substance use, including the Canadian Centre on Substance Use and Addiction (CCSA),  
7 the Centre for Addiction and Mental Health (CAMH) and the Canadian Agency for  
8 Drugs and Technologies in Health (CADTH).  
9

10 Both the CCSA and CAMH are leading Canadian research centers for substance  
11 use and addiction, providing guidelines to care, research and education.[43, 44] The  
12 CADTH is a non-profit organization that provides evidence for health care  
13 decisionmakers [45] The keywords used to search the electronic databases will be applied  
14 for the grey literature search.  
15

16 **Inclusion criteria:** To be included in the review, studies must a) discuss a family-  
17 focused substance use prevention intervention; b) have the immigrant youth (aged 12–17  
18 years) as the intervention target; c) be published in English and d) be conducted in  
19 Canada, the United States, Europe, Australia, or New Zealand. These regions have been  
20 chosen because they are key destinations for international migrants.  
21

22 **Exclusion criteria:** Interventions that are not family focused, focus on youth  
23 older than 17 years or focus on native-born populations will not be included in the study.  
24 Also, literature reviews, letters to the editors and opinion pieces will be excluded from  
25 the study.  
26

27 **Step 3: Study Selection:** The search results will be exported to a reference  
28 management system, and the inclusion and exclusion criteria will be applied. Two  
29 reviewers will be involved in the screening process. A third reviewer will be involved as  
30 a tie breaker in instances where the two reviewers cannot agree on whether to include or  
31 exclude an article.  
32

33 **Step 4: Charting the data:** The research team will extract information from the  
34 articles using a table with the following columns: (1) author(s), year of publication and  
35 title, (2) characteristics of intervention and (3) outcomes and significant findings.  
36

37 **Step 5: Collating, summarizing and reporting results:** The purpose of  
38 conducting the scoping review is to map out findings and provide an overview of the  
39 topic.[42] We will report the research results based on the PRISMA guidelines, a method  
40 for reviewing literature that is useful in reviewing health care interventions.[46]  
41 Therefore, firstly, we will provide a basic numerical description of the articles included in  
42 the study, including their locations, the interventions studied and the approaches used in  
43 the interventions. Secondly, we will synthesis the data and identify common themes that  
44 emanate from the extracted data. A narrative description of these themes will be  
45 developed to convey the main findings.  
46

47 **Step 6: Sharing the study findings/ patient and public involvement:** We will  
48 present this scoping review's preliminary findings to the CAC and thereafter to the wider  
49 stakeholders involved in providing services to newcomers and immigrants with limited  
50 English abilities. During this meeting, we will seek their feedback regarding the  
51 presentation and initiate the process of identifying an intervention from the presentation  
52 that can be adapted to serve the local immigrant community. Data collected in this phase  
53 will inform grant applications for intervention development and implementation.  
54

## 55 Discussion

56  
57  
58  
59  
60

1  
2  
3  
4 The decision to conduct a scoping review of family-based substance use  
5 prevention interventions for immigrant youth has been informed by stakeholders, who  
6 observed that there is a dearth of literature on substance use interventions and  
7 programming that focus on immigrant youth. Moreover, immigrant parents have  
8 expressed a desire to build capacity to prevent and mitigate the risks of substance use that  
9 the youth face. Parents' active engagement in preventing their youth's substance use can  
10 help youth realise the consequences of substance use and hopefully help them avoid  
11 engaging in these practices.[29-31] The scoping review is therefore set in such a manner  
12 that it applies the community-based research principles from the conceptualisation of the  
13 idea to the eventual implementation of a family-based substance use prevention  
14 intervention for immigrant youth. Researchers and community stakeholders are set to  
15 work collaboratively in hopes that this partnership will increase parental knowledge of  
16 substance use, address critical societal issues related to substance use, contribute to public  
17 health and enhance ownership and uptake of the research findings.[47, 48]

19 This research project is grounded on the understanding that newcomers and  
20 immigrants are a vulnerable population. While they may have better health indicators  
21 than the native population at the time of immigration, this advantage tends to wane with  
22 the increasing length of stay in the host country.[49] Therefore, supporting newcomers  
23 and immigrants navigate one of the imminent risks that they face even before they  
24 acclimatize and settle in their new county is needed. This work also takes a social justice  
25 lens because of the socioeconomic and health inequalities that newcomers and  
26 immigrants face, which make them vulnerable to health conditions. For instance, besides  
27 contending with cultural shock, racial issues, and a new way of life, most newcomers and  
28 immigrants often struggle to secure employment that matches their skills and  
29 qualifications.[50] Hence, most are at a higher risk of living in poverty than the native  
30 population.[51] This low socioeconomic status increases their risks of developing mental  
31 illnesses, limits their ability to parent effectively and even increases their risk of engaging  
32 in maladaptive behaviors to deal with the ensuing stress.[24, 52]

35 Immigrant parents are important resources for the youth and can influence their  
36 behavior by transmitting values, beliefs, and rules on substance use.[29] However, raising  
37 children and supporting youth in a foreign country with no social support or extended  
38 family may prove to be an additional challenge for many parents who already face  
39 cultural and social challenges.[53, 54] Nevertheless, resources for immigrants that would  
40 help them avoid substance use are urgently required. Early onset of substance use  
41 increases risks for poor educational outcomes, substance use disorders, substance-related  
42 death and even suicides.[55, 56] Such resources could help immigrant youth avoid  
43 behaviors and practices that would hinder their ability to achieve academic and future  
44 success.[57, 58]

47 This scoping review could contribute to the growing knowledge about  
48 immigrants' substance use, inform policy development on best practices in substance use  
49 prevention programs for immigrant youth, and help create culturally sensitive programs  
50 and services for the immigrant population.

### 52 **Limitations of the review**

53  
54 Limiting the studies included in this review to those published in English means  
55 that literature that would have been relevant for our study will be omitted. Also, including  
56  
57

1  
2  
3 only substance use prevention interventions aimed at immigrant youth deprives this study  
4 of potentially relevant interventions that could be culturally adapted to support the  
5 affected community.  
6

### 7 8 **Patient and Public Involvement**

9 As this is a scoping review protocol, the public and community stakeholders will be  
10 involved in the presenting data stage. Researchers will show research results via a one-  
11 day knowledge event, and the public and community stakeholders will provide feedback  
12 regarding the presentation and initiate the process of identifying an intervention from the  
13 presentation that can be adapted to serve the local immigrant community.  
14

### 15 16 **Acknowledgements**

17 We thank Kevin Read (Librarian, Leslie & Irene Dubé Health Sciences Library,  
18 University of Saskatchewan) for his insightful suggestions on developing search  
19 strategies.  
20

### 21 22 **Contributors**

23 YL was responsible for writing the protocol. GM provided in-depth input to the protocol  
24 by refining the protocol and providing edits and suggestions. He proofread the drafts and  
25 approved the final manuscript. MP and JA edited and proofread the protocol. YF  
26 reviewed the final draft and provided feedback.  
27

### 28 29 **Funding statement**

30 This scoping review has been supported by Canadian Research Initiative in Substance  
31 Misuse (CRISM).  
32

### 33 34 **Competing interests**

35 None declared  
36

### 37 38 **Ethics and dissemination**

39 As a scoping review, this project does not require ethics approval.  
40  
41  
42  
43  
44  
45  
46  
47  
48  
49  
50  
51  
52  
53  
54  
55  
56  
57  
58  
59  
60

## References

1. Belzak L, Halverson J. The opioid crisis in Canada: a national perspective. La crise des opioïdes au Canada: une perspective nationale. *Health Promot Chronic Dis Prev Can.* 2018;38(6):224-33.
2. Nuckols CC. The Diagnostic and Statistical Manual of Mental Disorders, (DSM-5). Philadelphia: American Psychiatric Association. 2013.
3. Report of the International Narcotics Control Board for 2013 [Internet]. New York: United Nations; 2014 [cited 2020 Oct 15]. Available from: [https://www.incb.org/documents/Publications/AnnualReports/AR2013/English/AR\\_2013\\_E.pdf](https://www.incb.org/documents/Publications/AnnualReports/AR2013/English/AR_2013_E.pdf)
4. Pan-Canadian Trends in the Prescribing of Opioids and Benzodiazepines, 2012 to 2017 [Internet]. Ottawa: Canadian institute for Health Information; 2018 [cited 2020 Oct 15]. Available from: <https://www.cihi.ca/sites/default/files/document/opioid-prescribing-june2018-en-web.pdf>
5. Canada's Opioid Crisis (fact sheet) [Internet]. Ottawa: Government of Canada; 2019 Mar [updated 2019 Apr 9; cited 2020 Oct 15]. Available from: <https://www.canada.ca/en/health-canada/services/publications/healthy-living/canada-opioid-crisis-fact-sheet.html>
6. Number of opioid overdose deaths in Canada in 2019, by province [Internet]. New York: Statista; 2020 [cited 2020 Oct 16]. Available from: <https://www.statista.com/statistics/812260/number-of-deaths-from-opioid-overdose-canada-province/>
7. Alcohol [Internet]. Ottawa: Canadian Centre on Substance Use and Addiction; 2019 [cited 2020 Oct 15]. Available from: <https://www.ccsa.ca/sites/default/files/2019-09/CCSA-Canadian-Drug-Summary-Alcohol-2019-en.pdf>
8. Ferreras J. Marijuana is legal everywhere across Canada now [Internet]. [Place unknown]: Global News; 2018 Oct 16 [updated 2018 Oct 17; cited 2020 Oct 15]. Available from: <https://globalnews.ca/news/4559085/marijuana-legalization-canada-midnight/>
9. Strengthening Canada's Approach to Substance Use Issues [Internet]. Ottawa: Government of Canada; 2018 Sep 5 [updated 2018 Sep 10; cited 2020 Oct 15]. Available from: <https://www.canada.ca/en/health-canada/services/substance-use/canadian-drugs-substances-strategy/strengthening-canada-approach-substance-use-issue.html#a2>
10. Robermann M. What has changed since cannabis was legalized? [Internet]. Ottawa: Statistics Canada; 2020 [cited 2020 Oct 15]. Available from: <https://www150.statcan.gc.ca/n1/pub/82-003-x/2020002/article/00002-eng.htm>
11. National Cannabis Survey, third quarter 2019 [Internet]. Ottawa: Statistics Canada; 2019 [cited 2020 Oct 15]. Available from: <https://www150.statcan.gc.ca/n1/en/daily-quotidien/191030/dq191030a-eng.pdf?st=CA3bjnNI>
12. Summary of results for the Canadian Student Tobacco, Alcohol and Drugs Survey 2018 – 19; 2019 [updated 2019 Dec 23; cited 2020 Oct 15]. Available from: <https://www.canada.ca/en/health-canada/services/canadian-student-tobacco-alcohol-drugs-survey/2018-2019-summary.html>

13. Methamphetamine [Internet]. Ottawa: Canadian Centre on Substance Use and Addiction; 2018 [cited 2020 Oct 15]. Available from: <https://www.ccsa.ca/sites/default/files/2019-04/CCSA-Canadian-Drug-Summary-Methamphetamine-2018-en.pdf>
14. Canadian Substance Use Costs and Harms 2015-2017 [Internet]. Ottawa: Canadian Centre on Substance Use and Addiction; 2020 [cited 2020 Oct 15]. Available from: <https://www.ccsa.ca/sites/default/files/2020-06/CSUCH-Canadian-Substance-Use-Costs-Harms-Report-2020-en.pdf>
15. Focus on Geography Series, 2016 Census [Internet]. Ottawa: Statistics Canada; 2017 [updated 2019 Apr 18; cited 2020 Oct 15]. Available from <https://www12.statcan.gc.ca/census-recensement/2016/as-sa/fogs-spg/Facts-CAN-Eng.cfm?TOPIC=2&LANG=Eng&GK=CAN&GC=01>
16. 2018 Annual Report to Parliament on Immigration [Internet]. Ottawa: Government of Canada; 2018 [updated 2019 Feb 26; cited Oct 15]. Available from: <https://www.canada.ca/en/immigration-refugees-citizenship/corporate/publications-manuals/annual-report-parliament-immigration-2018/report.html>
17. Canada's population estimates: Age and sex, July 1, 2019 [Internet]. Ottawa: Statistics Canada; 2019 [cited 2020 Oct 15]. Available from: <https://www150.statcan.gc.ca/n1/daily-quotidien/190930/dq190930a-eng.htm>
18. Duffin E. Number of recent immigrants in Saskatchewan 2000-2019 [Internet]. New York: Statista; 2019 [cited 2020 Oct 15]. Available from: <https://www.statista.com/statistics/609178/number-of-immigrants-in-saskatchewan/>
19. Bui HN. Racial and ethnic differences in the immigrant paradox in substance use. *J Immigr Minor Health* 2013 Oct 1;15(5):866–81. doi: 10.1007/s10903-012-9670-y
20. Gordon MM. Assimilation in American life: The role of race, religion, and national origins. Oxford University Press on Demand; 1964. Hirschman C, Kasinitz P, Dewind J, editors. *The Handbook of International Migration: The American Experience*. Russell Sage Foundation; 1999 Nov 4.
21. McCann M. Drug Knowledge, Attitudes, Beliefs and Use Among Chinese International Students on the West Coast of the US and Canada. Saint Mary's College of California; 2018.
22. Moloney M, Hunt G, Evans K. Asian American identity and drug consumption: From acculturation to normalization. *J Ethn Subst Abuse* 2008 Dec 2;7(4):376–403. doi: 10.1080/15332640802508168
23. Borges G, Medina-Mora ME, Breslau J, et al. The effect of migration to the United States on substance use disorders among returned Mexican migrants and families of migrants. *Am J Public Health* 2007 Oct;97(10):1847–51. doi: 10.2105/AJPH.2006.097915
24. Robert A, Gilkinson T. Mental health and well-being of recent immigrants in Canada: Evidence from the longitudinal survey of immigrants to Canada. *Immigrant integration: Research implications for future policy*. 2012 Nov:191–210.
25. Hamilton HA, van der Maas M, Boak A, et al. Subjective social status, immigrant generation, and cannabis and alcohol use among adolescents. *J Youth Adolescence* 2014 Jul 1;43(7):1163–75. doi: 10.1007/s10964-013-0054-y

- 1  
2  
3  
4  
5  
6  
7  
8  
9  
10  
11  
12  
13  
14  
15  
16  
17  
18  
19  
20  
21  
22  
23  
24  
25  
26  
27  
28  
29  
30  
31  
32  
33  
34  
35  
36  
37  
38  
39  
40  
41  
42  
43  
44  
45  
46  
47  
48  
49  
50  
51  
52  
53  
54  
55  
56  
57  
58  
59  
60
26. Burlew AK, Johnson CS, Flowers AM, et al. Neighborhood risk, parental supervision and the onset of substance use among African American adolescents. *J Child Fam Stud* 2009 Dec 1;18(6):680–9. doi: 10.1007/s10826-009-9273-y
  27. Myers R, Chou CP, Sussman S, et al. Acculturation and substance use: Social influence as a mediator among Hispanic alternative high school youth. *J Health Soc Behav* 2009 Jun;50(2):164–79. doi: 10.1177/002214650905000204
  28. Trucco EM, Colder CR, Wieczorek WF. Vulnerability to peer influence: A moderated mediation study of early adolescent alcohol use initiation. *Addict Behav* 2011 Jul 1;36(7):729–36.
  29. Özdemir M, Koutakis N. Does promoting parents' negative attitudes to underage drinking reduce adolescents' drinking? The mediating process and moderators of the effects of the Örebro Prevention Programme. *Addiction* 2016 Feb;111(2):263–71. doi: 10.1111/add.13177
  30. Koning IM, Van den Eijnden RJ, Engels RC, et al. Why target early adolescents and parents in alcohol prevention? The mediating effects of self-control, rules and attitudes about alcohol use. *Addiction* 2011 Mar;106(3):538–46. doi: 10.1111/j.1360-0443.2010.03198.x
  31. Villagrana M, Lee SY. Parental influence on adolescent cigarette, alcohol and marijuana use: A focus on race/ethnicity and age. *Child Adolesc Soc Work J* 2018 Apr 1;35(2):107–18. doi: 10.1007/s10560-017-0518-0
  32. Williams LR, Ayers S, Baldwin A, et al. Delaying youth substance-use initiation: A cluster randomized controlled trial of complementary youth and parenting interventions. *J Soc Social Work Res* 2016 Mar 1;7(1):177–200. doi: 10.1086/685298
  33. Delforterie MJ, Verweij KJ, Creemers HE, et al. Parental solicitation, parental control, child disclosure, and substance use: native and immigrant Dutch adolescents. *Ethn Health* 2016 Nov 1;21(6):535–50. doi: 10.1080/13557858.2015.1126562
  34. American Dietetic Association. Position of the American Dietetic Association: individual-, family-, school-, and community-based interventions for pediatric overweight. *J Am Diet Assoc* 2006 Jun;106(6):925–45. doi: 10.1016/j.jada.2006.03.001.
  35. Daley DC. Family and social aspects of substance use disorders and treatment. *J Food and Drug Anal* 2013 Dec 1;21(4):S73–6. doi: 10.1016/j.jfda.2013.09.038
  36. Pantin H, Schwartz SJ, Sullivan S, et al. Preventing substance abuse in Hispanic immigrant adolescents: An ecodevelopmental, parent-centered approach. *Hisp J Behav Sci* 2003 Nov;25(4):469–500. doi: 10.1177/0739986303259355
  37. Adams N. Using community engagement to map pathways of opioid use and recovery. *J Community Health Nurs* 2020 Jan 2;37(1):1–8. doi: 10.1080/07370016.2020.1693089
  38. Slobodin O, de Jong JT. Family interventions in traumatized immigrants and refugees: a systematic review. *Transcult Psychiatry* 2015 Dec;52(6):723–42. doi: 10.1177/1363461515588855
  39. Mays N, Roberts E, Popay J. Synthesising research evidence. In: Fulop N, Allen P, Clarke A, et al., editors. *Studying the Organization and Delivery of Health Services: Research Methods*. London: Routledge; 2001:188–220. doi: 10.4324/9780203481981



40. Simonds VW, Wallerstein N, Duran B, Villegas M. Community-based participatory research: Its role in future cancer research and public health practice. *Prev Chronic Dis* 2013;10:E78. doi: 10.5888/pcd10.120205
41. Strand K, Marullo S, Cutforth NJ, et al. Principles of best practice for community-based research. *Mich J Community Serv Learn* Spring 2003; 9:5–15. Available from: <http://hdl.handle.net/2027/spo.3239521.0009.301>
42. Arksey H, O'Malley L. Scoping studies: Towards a methodological framework. *Int JSoc Res Methodol* 2005 Feb 1;8(1):19–32. doi: 10.1080/1364557032000119616
43. Our Focus [Internet]. Ottawa: Canadian Centre on Substance Use and Addiction (CCSA); 2020 [cited 2020 Oct 15]. Available from: <https://www.ccsa.ca/our-focus>
44. About CAMH [Internet]. Toronto: The Centre for Addiction and Mental Health (camh); 2020 [cited 2020 Oct 15]. Available from: <https://www.camh.ca/en/driving-change/about-camh>
45. About CADTH [Internet]. Ottawa: Canadian Agency for Drugs and Technologies in Health (CADTH); 2020 [cited 2020 Oct 15]. Available from: <https://www.cadth.ca/about-cadth>
46. Moher D, Liberati A, Tetzlaff J, et al. Preferred reporting items for systematic reviews and meta-analyses: The PRISMA statement. *PLoS Med* 2009 Jul 21;6(7):e1000097. doi: 10.1371/journal.pmed.1000097
47. Stanton TK. New times demand new scholarship: Opportunities and challenges for civic engagement at research universities. *Educ, Citizensh Soc Justice* 2008 Mar;3(1):19–42. doi: 10.1177/1746197907086716
48. Wallerstein NB, Duran B. Using community-based participatory research to address health disparities. *Health Promot Pract* 2006 Jul;7(3):312–23. doi: 10.1177/1524839906289376
49. Vang ZM, Sigouin J, Flenon A, et al. Are immigrants healthier than native-born Canadians? A systematic review of the healthy immigrant effect in Canada. *Ethn Health* 2017 May 4;22(3):209–41. doi: 10.1080/13557858.2016.1246518
50. Hudon T. Immigrant women [Internet]. Ottawa: Statistics Canada; 2015. Available from: <https://www150.statcan.gc.ca/n1/pub/89-503-x/2015001/article/14217-eng.htm>
51. Data tables, 2016 Census [Internet]. Ottawa: Statistics Canada; 2019 [updated 2019 Jun 17; cited 2020 Oct 15]. Available from: <https://www12.statcan.gc.ca/census-recensement/2016/dp-pd/dt-td/Rp-eng.cfm?LANG=E&APATH=3&DETAIL=0&DIM=0&FL=A&FREE=0&GC=0&GID=0&GK=0&GRP=1&PID=110561&PRID=10&PTYPE=109445&S=0&SHOWALL=0&SUB=0&Temporal=2017&THEME=120&VID=0&VNAMEE=&VNAMEF=>
52. Beiser M, Hou F, Hyman I, et al. Poverty, family process, and the mental health of immigrant children in Canada. *Am J Public Health* 2002 Feb;92(2):220–7. doi: 10.2105/ajph.92.2.220
53. Singh S, McBride K, Kak V. Role of social support in examining acculturative stress and psychological distress among Asian American immigrants and three sub-groups: Results from NLAAS. *J Immigr Minor Health* 2015 Dec 1;17(6):1597–606. doi: 10.1007/s10903-015-0213-1
54. Bornstein MH, Bohr Y. Immigration, acculturation and parenting. *Encyclopedia on early childhood development*. 2011:1–8.

- 1  
2  
3 55. Mundt MP. The impact of peer social networks on adolescent alcohol use initiation.  
4 *Acad Pediatr* 2011 Sep 1;11(5):414–21. doi: 10.1016/j.acap.2011.05.005  
5  
6 56. Wen X, Shenassa ED. Interaction between parenting and neighborhood quality on the  
7 risk of adolescent regular smoking. *Nicotine Tob Res* 2012 Mar 1;14(3):313–22. doi:  
8 10.1093/ntr/ntr215  
9  
10 57. Enriquez L. "Because we feel the pressure and we also feel the support": Examining  
11 the educational success of undocumented immigrant Latina/o students. *Harv Educ*  
12 *Rev* 2011 Sep 1;81(3):476–500. doi: 10.17763/haer.81.3.w7k703q050143762  
13  
14 58. Jaffe-Walter R, Lee SJ. "To trust in my root and to take that to go forward":  
15 Supporting college access for immigrant youth in the global city. *Anthropol Educ Q*  
16 2011 Sep;42(3):281–96. doi: 10.1111/j.1548-1492.2011.01132.x  
17  
18  
19  
20  
21  
22  
23  
24  
25  
26  
27  
28  
29  
30  
31  
32  
33  
34  
35  
36  
37  
38  
39  
40  
41  
42  
43  
44  
45  
46  
47  
48  
49  
50  
51  
52  
53  
54  
55  
56  
57  
58  
59  
60

**APPENDIX 1: SEARCHING KEYWORDS FOR THE SCOPING REVIEW**

| <b>Family</b> | <b>Adolescent</b> | <b>Prevention</b> | <b>Immigration</b> | <b>Substance Use</b> |
|---------------|-------------------|-------------------|--------------------|----------------------|
| Family        | Adolescent        | Prevent*          | Immigrat*          | Substance use        |
| Families      | Youth             |                   | Alien*             | Drug use             |
| Familial      |                   |                   | Emigrant*          | Marijuana            |
| Mother*       |                   |                   | Foreigner*         | Cocaine              |
| Parent*       |                   |                   | Immigrant*         | Heroin               |
| Sibling*      |                   |                   | Refugee*           | Alcohol              |
| Grandparent*  |                   |                   | migrant*           | Cigarette            |
| Elder*        |                   |                   | asylum             | methamphetamine      |
| Aunt*         |                   |                   | newcomer*          |                      |
| Uncle*        |                   |                   |                    |                      |
| Cousin*       |                   |                   |                    |                      |
| Brother*      |                   |                   |                    |                      |
| Sister*       |                   |                   |                    |                      |

# BMJ Open

## Exploring family-based immigrant youth substance use prevention programs: A scoping review protocol

|                                 |                                                                                                                                                                                                                                                    |
|---------------------------------|----------------------------------------------------------------------------------------------------------------------------------------------------------------------------------------------------------------------------------------------------|
| Journal:                        | <i>BMJ Open</i>                                                                                                                                                                                                                                    |
| Manuscript ID                   | bmjopen-2020-046766.R1                                                                                                                                                                                                                             |
| Article Type:                   | Protocol                                                                                                                                                                                                                                           |
| Date Submitted by the Author:   | 06-Apr-2021                                                                                                                                                                                                                                        |
| Complete List of Authors:       | Li, Yiyang; University of Saskatchewan<br>Maina , Geoffrey; University of Saskatchewan,<br>Pandey, Mamata; Saskatchewan Health Authority<br>Amoyaw, Jonathan; Dalhousie University<br>Fang, Yiting; University of Saskatchewan, College of Nursing |
| <b>Primary Subject Heading</b>: | Public health                                                                                                                                                                                                                                      |
| Secondary Subject Heading:      | Addiction, Public health, Qualitative research                                                                                                                                                                                                     |
| Keywords:                       | Substance misuse < PSYCHIATRY, PUBLIC HEALTH, Community child health < PAEDIATRICS                                                                                                                                                                 |
|                                 |                                                                                                                                                                                                                                                    |

SCHOLARONE™  
Manuscripts



I, the Submitting Author has the right to grant and does grant on behalf of all authors of the Work (as defined in the below author licence), an exclusive licence and/or a non-exclusive licence for contributions from authors who are: i) UK Crown employees; ii) where BMJ has agreed a CC-BY licence shall apply, and/or iii) in accordance with the terms applicable for US Federal Government officers or employees acting as part of their official duties; on a worldwide, perpetual, irrevocable, royalty-free basis to BMJ Publishing Group Ltd ("BMJ") its licensees and where the relevant Journal is co-owned by BMJ to the co-owners of the Journal, to publish the Work in this journal and any other BMJ products and to exploit all rights, as set out in our [licence](#).

The Submitting Author accepts and understands that any supply made under these terms is made by BMJ to the Submitting Author unless you are acting as an employee on behalf of your employer or a postgraduate student of an affiliated institution which is paying any applicable article publishing charge ("APC") for Open Access articles. Where the Submitting Author wishes to make the Work available on an Open Access basis (and intends to pay the relevant APC), the terms of reuse of such Open Access shall be governed by a Creative Commons licence – details of these licences and which [Creative Commons](#) licence will apply to this Work are set out in our licence referred to above.

Other than as permitted in any relevant BMJ Author's Self Archiving Policies, I confirm this Work has not been accepted for publication elsewhere, is not being considered for publication elsewhere and does not duplicate material already published. I confirm all authors consent to publication of this Work and authorise the granting of this licence.

1           1           **Exploring family-based immigrant youth substance use prevention programs: A**  
2           2                           **scoping review protocol**

3  
4  
5  
6           3  
7           4           **Authors**

8           5           **Corresponding author, first author:**

9           6           Yiyan Li, PhD

10          7          Postdoctoral Fellow,

11          8          College of Nursing, Prince Albert Campus

12          9          University of Saskatchewan

13          10          244 1061 Central Avenue

14          11          Prince Albert, SK, S6V 4T1

15          12          Email: yiyan.li@usask.ca

16          13          Tel: 306-881-5413

17  
18          14  
19          15          **Co-author:**

20          16          Geoffrey Maina, R.N. PhD.

21          17          Assistant Professor,

22          18          College of Nursing, Prince Albert Campus,

23          19          University of Saskatchewan

24          20          Office 173, 130 1061 Central Avenue

25          21          Prince Albert, SK, S6V 4V4

26          22          Email: geoffrey.maina@usask.ca

27          23          Tel: 306-765-3887

28  
29          24  
30          25          **Co-author:**

31          26          Mamata Pandey, PhD.

32          27          Research Scientist, Saskatchewan Health Authority

33          28          1801 Toronto Street, Regina, SK, S4P 1M7

34          29          Email: mamata.pandey@saskhealthauthority.ca

35          30          Tel: 306-520-3321

36  
37          31  
38          32          **Co-author:**

39          33          Jonathan Amoyaw, PhD.

40          34          Assistant Professor,

41          35          Department of Sociology and Social Anthropology,

42          36          Dalhousie University

43          37          McCain Building, 6135 University Avenue PO Box 15000,

44          38          Halifax, NS, B3H 4R2

45          39          Email: jonathan.amoyaw@dal.ca

46          40          Tel: 519-280-5827

47  
48          41  
49          50          **Co-author:**

50          51          Yiting Fang, Master student

51          52          College of Nursing, Prince Albert Campus,

52          53          University of Saskatchewan

53          54          138 - 1061 Central Avenue

1  
2  
3 47 Prince Albert, SK, S6V 4V4  
4 48 Email: yif244@mail.usask.ca  
5 49  
6 50  
7 51  
8 51

9 52 **Word Count: 3,006 (exclude the abstract, references and acknowledgements)**  
10 53  
11 54

12 55 **Exploring family-based immigrant youth substance use prevention programs: A**  
13 56 **scoping review protocol**  
14 57  
15 57

16 58 **Abstract**

17 59 **Introduction:** Canada has one of the highest rates of problematic opiate and alcohol use  
18 60 in the world. It was also the second country in the world to legalize marijuana for  
19 61 recreational use. As Canada is an immigrant-receiving country, newcomers and  
20 62 immigrants contend with a substance use landscape that was likely absent in their  
21 63 countries of origin. Although immigrants have lower rates of substance use than the host  
22 64 population, the risk of substance use, especially among youth, increases with  
23 65 acculturation and peer pressure. While parents are best placed to mitigate the risks for  
24 66 substance use among their youth, immigrant parents often do not have the knowledge and  
25 67 skills to do so. Therefore, culturally adaptable family-based interventions need be  
26 68 explored to build immigrant parents' capacities to mitigate substance use risks.  
27 69

28 69  
29 70 **Aim and purpose:** The aim of this scoping review is to explore family-based substance  
30 71 use prevention interventions for immigrant youth, which will be guided by two questions:

- 31 71  
32 72 1. What is known about family-based interventions for preventing immigrant  
33 73 adolescents' substance use?  
34 74 2. What are the characteristics and outcomes of these intervention protocols?  
35 75

36 76 **Methods and analysis:** We will apply Arksey and O'Malley's procedure for reporting  
37 77 scoping review and report study findings based on the PRISMA guidelines for scoping  
38 78 reviews.  
39 79

40 79  
41 80 **Discussion:** We hope that the knowledge translation emanating from this review will  
42 81 increase immigrant parents' knowledge of substance use and enable them to effectively  
43 82 intervene to prevent substance use among their youth. We also hope that this work can  
44 83 inform policy development on best practices for substance use prevention and for the  
45 84 creation of culturally sensitive programs and services for immigrant youth.  
46 85

47 85  
48 86 **Keywords:** Public Health; Family Relations; Emigrants and Immigrant; Substance-  
49 87 Related Disorders  
50 88

51 89 **Strengths and limitations of this study**  
52 90

- 53 90  
54 91 1. This study will provide insights into family-focused substance use prevention  
55 92 interventions for immigrant youth that can be adapted and applied to a local setting.  
56  
57

- 1  
2  
3 93 2. This study will help reorient the role of families in substance use prevention and  
4 94 identify strategies that may help families play that role.  
5 95 3. The scoping review is limited to family-based, immigrant-focused substance use  
6 96 interventions that are published in English.  
7 97 4. The exclusion of interventions that do not target immigrants may limit the research by  
8 98 excluding relevant programs that may be applicable to the population of interest.  
9 99

10  
11  
12  
13  
14  
15  
16  
17  
18  
19  
20  
21  
22  
23  
24  
25  
26  
27  
28  
29  
30  
31  
32  
33  
34  
35  
36  
37  
38  
39  
40  
41  
42  
43  
44  
45  
46  
47  
48  
49  
50  
51  
52  
53  
54  
55  
56  
57  
58  
59  
60

For peer review only



## Background

### *Substance and addiction landscape in Canada*

The use of both licit and illicit substances is a growing problem in Canada. Canada has the second-highest consumption of prescription opioids in the world due to over-prescription and non-medical use of these strong analgesics [1–3]. The use of opioids for non-medical purposes for both licit and illicit drugs is a serious public health problem causing opioid use disorder, a problematic pattern of opioid use that leads to clinically significant impairment or distress, and significantly impacts people's qualities of life, occupations and relationships [2, 3, 4]. In Canada, youth has become the fastest-growing population for opioids overdoses, which requires hospital care [5]. Alcohol use among children in grades 7 to 12 is high, with 44% reporting alcohol consumption in 2018 [6]. In Ontario, about 14% of teens have reported using prescription opioids for extra-medical use [7]. About 55% of vehicle accidents that involve youth are caused by alcohol or drugs, and car accidents and are the leading cause of youth death in Canada [8].

In 2018, Canada became the second country to legalize cannabis [9], which is the second-most used substance in Canada [10]. In the third quarter of 2019, about 26% of adolescents and young adults (aged 15–24) reported having used cannabis [11], while 18% of students (about 374,000) in grades 7 to 12 reported using cannabis in 2018–2019 [12]. Adolescents' cannabis use is associated with an increased risk of mental health illnesses, poor academic outcomes and personal disadvantages [13]. Methamphetamine use is also prevalent among youth and young adults, with 1.2% of Canadian students in grades 7 to 12 reporting using it in 2015 [14]. In 2017–2018, 23,580 hospitalizations among youth were caused by substance misuse [15]. Among these youth, about 17% of them had more than one hospitalization in the same year and about two-thirds of them had concurrent mental health issues [15].

### *Immigrants and attitude towards substance use*

Canada is a popular destination for international migration, and immigrants have become an important driver of population and economic growth. The 2016 Census showed that immigrants accounted for 21.9% of the Canadian population [16]. In 2017–2018, 80% of Canada's population growth was driven by immigrants, and in 2019, 313,580 new immigrants landed in Canada [17,18]. Although Canada pursues a multicultural policy, immigrants to Canada, especially the youth acculturate at a higher rate than adults[19,20]. The prevailing socio-cultural climate of the destination country i.e. Canada, impacts how immigrants and newcomers acculturate [21]. One of the realities that immigrants are confronted with is the perversity of substance use that differs from their countries of origin [22]. Yet, although new immigrant youth are less likely to experiment with substances, their risk of substance use increases with their length of stay [23]. In so doing, they embrace beliefs, values, attitudes and behaviors of the host nations that their parents may deem risky or unsafe[21,24].

Immigrants' attitudes towards substances may be informed by availability and acceptability of these substances at home and in their host country. For instance, immigrants who come from countries where plant products are commonly used are more likely to accept cannabis than those who do not [25,26]. Also, since alcohol and

1  
2  
3 146 marijuana are easily accessible and socially acceptable substances in Canada, immigrants  
4 147 without prior exposure to them may be inclined to start using them for recreation  
5 148 purposes [27]. Moreover, immigrants' risk for substance use might be aggravated by  
6 149 immigration-related stress, which increases the risk of developing mental health illnesses  
7 150 [28]. Thus, new immigrants may use substances as a maladaptive coping mechanism to  
8 151 deal with stress induced by immigration and resettlement processes.

9 152

### 11 153 *Immigrant youth and risk of substance use*

12 154 Generally, new immigrant youth in Canada have a significantly lower level of  
13 155 substance use than their Canadian counterparts. For instance, a study by Hamilton et al.  
14 156 on subjective social status, immigration generations and substance use among youth,  
15 157 [29], 13% of first-generation immigrant youth in Ontario reported using cannabis before,  
16 158 while 9.8% drink alcohol regularly. In the same research, 22.6% of second-generation  
17 159 immigrant adolescents reported having used cannabis, and 16.8% consumed alcohol  
18 160 regularly [29]. The acculturation process has been cited as a risk factor for the initiation  
19 161 of substance use among immigrant youth [25,30]. Thus, immigrant youth may feel  
20 162 pressured to conform to the practices of their receiving country and feel the need to  
21 163 belong with their peers who may be using substances [25,30,31].

22 164 To mitigate the risks of substance use for immigrants, family-based substance use  
23 165 prevention programs are needed. Such programs must be culturally safe and empowering  
24 166 to parents with effective strategies to help youth navigate these risks [32,33]. Cultural  
25 167 safety is underpinned by principles of social justice and is grounded in critical theoretical  
26 168 perspectives, and draws attention to the impact of racialization, culturalization,  
27 169 discrimination, and disparities in health and access to health care among marginalized  
28 170 communities [34,35]. Family-based substance use prevention programs can be  
29 171 implemented in group settings with active family participation through role-plays,  
30 172 curriculum-based approaches, videos and youth-parent collaborative activities [34-37].

31 173 Due to the increased risk of substance use among immigrant youth in Canada, the  
32 174 research team, who majority of them are first-generation immigrants with diverse lived  
33 175 experiences, together with stakeholders involved in settlement programs identified a need  
34 176 to equip parents, guardians and caregivers with skills to mitigate this risk. This scoping  
35 177 review is guided by principles of community-based research, and as such, the research  
36 178 focus was informed by community partners. Any intervention that will emanate from this  
37 179 review will also be selected by the community partners. Community consultation is  
38 180 essential in grounding this review to foster ownership of the process and the  
39 181 outcome[38]. Therefore, this consultation yielded the following objectives that guide the  
40 182 scoping review: a) to understand substance use trends and the risks that their children  
41 183 may face; b) to detect early signs of substance use among youth; c) identify resources to  
42 184 mitigate the risks for immigrant youth substance use and to build capacity for families to  
43 185 intervene to delay or prevent substance use initiation. Although the definition of youth  
44 186 varies, for the purpose of this review, youth will be referred to those whose are range  
45 187 between 12-17 years of age.

46 188

47 189

48 190

1  
2  
3 191 Studies suggest that parents are important resources for substance use prevention  
4 192 among immigrant youth. Effective parenting, characterized by parental warmth and close  
5 193 supervision of children, can delay or prevent substance use initiation [31,39,40]. In  
6 194 addition, parents' zero tolerance of and clear rules about substance use can prevent  
7 195 substance use initiation [39,41,42]. A good family-based substance use prevention  
8 196 program for immigrant youth need to consider skills and behavioral and cultural factors  
9 197 when developing or adapting it [38]. These include understanding language limitations,  
10 198 the acculturation process, and the available support systems. It also needs to highlight  
11 199 family's role in protecting and supporting youth in the acculturation process [43].  
12  
13 200

### 201 **Aim and purpose**

202 The aim of this review is to explore the types and characteristics of family-based  
203 substance use prevention interventions for immigrant youth. The purpose of this project  
204 is to identify and describe family-based substance use prevention interventions that could  
205 potentially be adapted to support immigrant families in mitigating the risk of substance  
206 use initiation facing youth.  
21  
22 207

### 208 **Methods**

209 We will conduct a scoping review of family-based substance use prevention  
210 programs for immigrant youth to identify and describe these interventions. A scoping  
211 literature review focuses on an under-researched or complex research area and seeks to  
212 summarize key concepts, principles, main sources and evidence under that topic [44].  
213 This scoping review will be guided by community-based research principles, a  
214 collaborative, equal partnership between researchers and community members during the  
215 research process [38,45,46]. We will depend on stakeholders within the immigrant  
216 community to identify and refine the research problem, develop an appropriate  
217 knowledge translation tool and thereafter seek mechanisms for developing a culturally  
218 appropriate intervention for immigrant families [46]. This scoping review started with the  
219 consultation with community partners involved in providing settlement and integration  
220 services for immigrants. These partners will later be constituted to a community advisory  
221 committee (CAC) and will oversee the completion of the scoping review, knowledge  
222 translation and development of an intervention suitable for the targeted community.  
223 Immigrant youth will be involved in the knowledge event where the research team will  
224 present the results. Also, those youth will provide feedback regarding the review's  
225 findings. The scoping review will be guided by Arksey and O'Malley's [47] steps of  
226 conducting a scoping review, which are outlined below.

227 **Step 1: Identify the research question:** Through community consultation, the  
228 search terms were suggested which contributed to the formulation of research questions.  
229 A search has been conducted on PubMed, Web of Science and Prospero to ensure that no  
230 such scoping review has been done. The scoping review will be guided by two broad  
231 research questions: 1) what is known about family-based interventions for preventing  
232 immigrant youth's substance use? and 2) what are the characteristics and outcomes of  
233 these intervention protocols?

234 **Step 2: Identify relevant studies:** The research team, with the help of a health  
235 sciences librarian, has developed a strategy to search for published articles and grey  
236 literature. A concept map based on the following keywords has been developed to guide

1  
2  
3 237 the search for relevant publications: “family,” “prevention,” “immigration,” “youth,”  
4 238 “substance use” and types of substances. Appendix 1 is a prototype of a concept map that  
5 239 will be used to guide the review. A test search on MEDLINE has been conducted to  
6 240 assess its feasibility. Thereafter, the following databases will be searched for relevant  
7 241 studies: Ovid MEDLINE, 1946 to present; CINAHL (EBSCO); EMBASE, 1947 to  
8 242 present; Web of Science, 1900 to present; and APA PsycInfo, 1806 to present. For this  
9 243 scoping review, only literature published from 2000 to 2020 will be included. Limiting  
10 244 publications in the past 10 years is because substance use dynamic and interventions are  
11 245 changing and interventions older than 20 years may not suitable for current situation [48].  
12 246 All relevant studies will be downloaded and saved in Mendeley, a reference management  
13 247 software, and all duplicate references will be removed. Besides searching literature in  
14 248 databases, grey literature will also be included in this scoping review. The research team  
15 249 will search for grey literature from Canadian organizations related to substance use,  
16 250 including the Canadian Centre on Substance Use and Addiction (CCSA), the Centre for  
17 251 Addiction and Mental Health (CAMH) and the Canadian Agency for Drugs and  
18 252 Technologies in Health (CADTH). Searching for grey literature will be based on the  
19 253 keywords in the concept map, and specific steps will be adjusted based on the search  
20 254 engines’ results.

24 255 Both the CCSA and CAMH are leading Canadian research centers for substance  
25 256 use and addiction, providing guidelines to care, research and education [49,50]. The  
26 257 CADTH is a non-profit organization that provides evidence for health care  
27 258 decisionmakers [51] The keywords used to search the electronic databases will be applied  
28 259 for the grey literature search.

30 260 **Inclusion criteria:** To be included in the review, studies must a) discuss a family-  
31 261 focused substance use prevention intervention; b) empirical studies except reviews; c)  
32 262 have the immigrant youth (aged 12–17 years) as the intervention target; d) be published  
33 263 in English and e) be conducted in Canada, the United States, Europe, Australia, or New  
34 264 Zealand. These regions have been chosen because they are key destinations for  
35 265 international migrants. Also, considering the development stage and needs to be supervised  
36 266 by parents, participants’ age in this study will be between 12 to 17.

38 267 **Exclusion criteria:** Interventions that are not family focused, focus on youth  
39 268 older than 17 years or focus on native-born populations will not be included in the study.  
40 269 Also, literature reviews, letters to the editors and opinion pieces will be excluded from  
41 270 the study.

42 271 **Step 3: Study Selection:** The search results will be exported to a reference  
43 272 management system, Rayyan, and the inclusion and exclusion criteria will be applied.  
44 273 The research team will screen for title/abstract first to determine the suitability of the  
45 274 article to be included in the review. Two reviewers will be involved in the screening  
46 275 process. A third reviewer will be involved as a tie breaker in instances where the two  
47 276 reviewers cannot agree on whether to include or exclude an article.

49 277 **Step 4: Charting the data:** The research team will extract information from the  
50 278 articles using a table with the following columns: (1) author(s), year of publication and  
51 279 title, (2) characteristics of intervention and (3) outcomes and significant findings.

53 280 **Step 5: Collating, summarizing and reporting results:** The purpose of  
54 281 conducting the scoping review is to map out findings and provide an overview of the  
55 282 topic [47]. We will report the research results based on the PRISMA guidelines, a method  
56 283 for reviewing literature that is useful in reviewing health care interventions [52].

1  
2  
3 284 Therefore, firstly, we will provide a basic numerical description of the articles included in  
4 285 the study, including their locations, the interventions studied and the approaches used in  
5 286 the interventions. Secondly, we will synthesis the data and identify common themes that  
6 287 emanate from the extracted data. A narrative description of these themes will be  
7 288 developed to convey the main findings.

8 289 **Step 6: Sharing the study findings/ patient and public involvement:** We will  
9 290 present this scoping review's preliminary findings to the CAC and thereafter to the wider  
10 291 stakeholders involved in providing services to newcomers and immigrants with limited  
11 292 English abilities. During this meeting, we will seek their feedback regarding the  
12 293 presentation, scoping review's findings and initiate the process of identifying an  
13 294 intervention from the presentation that can be adapted to serve the local immigrant  
14 295 community. Data collected in this phase will inform grant applications for intervention  
15 296 development and implementation.  
16 297

### 17 298 **Discussion**

18 299 The decision to conduct a scoping review of family-based substance use  
19 300 prevention interventions for immigrant youth has been informed by stakeholders, who  
20 301 observed that there is a dearth of literature on substance use interventions and  
21 302 programming that focus on immigrant youth. Moreover, immigrant parents have  
22 303 expressed a desire to build capacity to prevent and mitigate the risks of substance use that  
23 304 the youth face. Parents' active engagement in preventing their youth's substance use can  
24 305 help youth realise the consequences of substance use and hopefully help them avoid  
25 306 engaging in these practices [39,41,42]. The scoping review is therefore set in such a  
26 307 manner that it applies the community-based research principles from the  
27 308 conceptualisation of the idea to the eventual implementation of a family-based substance  
28 309 use prevention intervention for immigrant youth. Researchers and community  
29 310 stakeholders are set to work collaboratively in hopes that this partnership will increase  
30 311 parental knowledge of substance use, address critical societal issues related to substance  
31 312 use, contribute to public health and enhance ownership and uptake of the research  
32 313 findings [53,54].

33 314 This research project is grounded on the understanding that newcomers and  
34 315 immigrants are a vulnerable population. While they may have better health indicators  
35 316 than the native population at the time of immigration, this advantage tends to wane with  
36 317 the increasing length of stay in the host country [55]. Therefore, supporting newcomers  
37 318 and immigrants navigate one of the imminent risks that they face even before they  
38 319 acclimatize and settle in their new country is needed. This work also takes a social justice  
39 320 lens because of the socioeconomic and health inequalities that newcomers and  
40 321 immigrants face, which make them vulnerable to health conditions. For instance, besides  
41 322 contending with cultural shock, racial issues, and a new way of life, most newcomers and  
42 323 immigrants often struggle to secure employment that matches their skills and  
43 324 qualifications [56]. Hence, most are at a higher risk of living in poverty than the native  
44 325 population [57]. This low socioeconomic status increases their risks of developing mental  
45 326 illnesses, limits their ability to parent effectively and even increases their risk of engaging  
46 327 in maladaptive behaviors to deal with the ensuing stress [28,58].

47 328 Immigrant parents are important resources for the youth and can influence their  
48 329 behavior by transmitting values, beliefs, and rules on substance use [39]. However,  
49  
50  
51  
52  
53  
54  
55  
56  
57

1  
2  
3 330 raising children and supporting youth in a foreign country with no social support or  
4 331 extended family may prove to be an additional challenge for many parents who already  
5 332 face cultural and social challenges [59,60]. Nevertheless, resources for immigrants that  
6 333 would help them avoid substance use are urgently required. Early onset of substance use  
7 334 increases risks for poor educational outcomes, substance use disorders, substance-related  
8 335 death and even suicides [61,62]. Such resources could help immigrant youth avoid  
9 336 behaviors and practices that would hinder their ability to achieve academic and future  
10 337 success [63,64].

11  
12 338 This scoping review could contribute to the growing knowledge about  
13 339 immigrants' substance use, inform policy development on best practices in substance use  
14 340 prevention programs for immigrant youth, and help create culturally sensitive programs  
15 341 and services for the immigrant population.  
16 342

### 17 343 **Limitations of the review**

18  
19 344 Limiting the studies included in this review to those published in English means  
20 345 that literature that would have been relevant for our study will be omitted. Also, including  
21 346 only substance use prevention interventions aimed at immigrant youth deprives this study  
22 347 of potentially relevant interventions that could be culturally adapted to support the  
23 348 affected community.  
24 349

### 25 350 **Patient and Public Involvement**

26  
27 351 Since this review is guided by the principles of community-based research, community  
28 352 advisory committee (CAC) will be actively involved in all the phases of the study  
29 353 including knowledge translation and dissemination and selection of an intervention. The  
30 354 research team will share the findings of the study with the targeted community in the  
31 355 region by organising a one-day knowledge exchange event. Thereafter the community  
32 356 will provide feedback on the content and initiate the process of identifying an  
33 357 intervention that can be adapted to address community needs.  
34 358

### 35 359 **Acknowledgements**

36  
37 360 We thank Kevin Read (Librarian, Leslie & Irene Dubé Health Sciences Library,  
38 361 University of Saskatchewan) for his insightful suggestions on developing search  
39 362 strategies.  
40 363

### 41 364 **Contributors**

42  
43 365 YL was responsible for writing the protocol. GM provided in-depth input to the protocol  
44 366 by refining the protocol and providing edits and suggestions. He proofread the drafts and  
45 367 approved the final manuscript. MP and JA edited and proofread the protocol. YF  
46 368 reviewed the final draft and provided feedback.  
47 369

### 48 370 **Funding statement**

49  
50 371 This scoping review has been supported by Canadian Research Initiative in Substance  
51 372 Misuse (CRISM).  
52 373

### 53 374 **Competing interests**

54  
55 375 None declared  
56  
57

1  
2  
3  
4  
5  
6  
7  
8  
9  
10  
11  
12  
13  
14  
15  
16  
17  
18  
19  
20  
21  
22  
23  
24  
25  
26  
27  
28  
29  
30  
31  
32  
33  
34  
35  
36  
37  
38  
39  
40  
41  
42  
43  
44  
45  
46  
47  
48  
49  
50  
51  
52  
53  
54  
55  
56  
57  
58  
59  
60

376  
377  
378  
379

**Ethics and dissemination**

As a scoping review, this project does not require ethics approval.

For peer review only

## References

- 1 Belzak L, Halverson J. The opioid crisis in Canada: a national perspective. *La crise des opioïdes au Canada: une perspective nationale. Heal Promot Chronic Dis Prev Can* 2018;**38**:224–33.
- 2 Degenhardt L, Grebely J, Stone J, *et al*. Global patterns of opioid use and dependence: harms to populations, interventions, and future action. *Lancet* 2019;**394**:1560–79. doi:10.1016/S0140-6736(19)32229-9
- 3 Strang J, Volkow ND, Degenhardt L, *et al*. Opioid use disorder. *Nat Rev Dis Prim* 2020;**6**. doi:10.1038/s41572-019-0137-5
- 4 American Psychiatric Association. *DIAGNOSTIC AND STATISTICAL MANUAL OF MENTAL DISORDERS(DSM-5)*. American Psychiatric Association 2013.
- 5 Government of Canada. Canada's Opioid Crisis (fact sheet). Gov. Canada. 2019. <https://www.canada.ca/en/health-canada/services/publications/healthy-living/canada-opioid-crisis-fact-sheet.html>
- 6 Statista. Number of opioid overdose deaths in Canada in 2019, by province. Statista. 2019.
- 7 The Centre for Addiction and Mental Health (camh). Youth and Prescription Painkillers. *Cent. Addict. Ment. Heal.* <https://www.camh.ca/en/health-info/guides-and-publications/youth-and-prescription-painkillers>
- 8 Drug Free Kids. Youth and Alcohol. 2021.
- 9 Canadian Centre on Substance Use and Addiction (CCSA). Alcohol (Canadian Drug Summary). 2019. <https://www.ccsa.ca/sites/default/files/2019-09/CCSA-Canadian-Drug-Summary-Alcohol-2019-en.pdf>
- 10 Ferreras J. Marijuana is legal everywhere across Canada now. *Glob. News.* 2018. <https://globalnews.ca/news/4559085/marijuana-legalization-canada-midnight/>
- 11 Statistics Canada. What has changed since cannabis was legalized? *Stat. Canada.* 2020. <https://www150.statcan.gc.ca/n1/pub/82-003-x/2020002/article/00002-eng.htm>
- 12 Statistics Canada. National cannabis survey, third quarter 2019. *Dly* 2019;:1–14.
- 13 Government of Canada. Strengthening Canada's Approach to Substance Use Issues. Gov. Canada. 2018.
- 14 Government of Canada. Summary of results for the Canadian Student Tobacco, Alcohol and Drugs Survey 2018-19. Gov. Canada. 2019. <https://www.canada.ca/en/health-canada/services/canadian-student-tobacco-alcohol-drugs-survey/2018-2019-summary.html>
- 15 Canadian Institute for Health Information. Hospital stays for harm caused by substance use among youth age 10 to 24. 2019;:1–22.
- 16 Statistics Canada. Focus on Geography Series, 2016 Census. *Stat. Canada.* 2019. <https://www12.statcan.gc.ca/census-recensement/2016/as-sa/fogs-spg/Facts-CAN-Eng.cfm?TOPIC=2&LANG=Eng&GK=CAN&GC=01>
- 17 Government of Canada. 2018 Annual Report To Parliament on Immigration. 2018;:1–43. <https://www.canada.ca/content/dam/ircc/migration/ircc/english/pdf/pub/annual->



- 1  
2  
3 426 report-2018.pdf  
4 427 18 Statistics Canada. Canada's population estimates: Age and sex, July 1, 2019. *Dly*  
5 428 Published Online First: 2019. <https://www150.statcan.gc.ca/n1/en/daily->  
6 429 [quotidien/190930/dq190930a-eng.pdf?st=nU9UcapR](https://www150.statcan.gc.ca/n1/en/daily-quotidien/190930/dq190930a-eng.pdf?st=nU9UcapR)  
7 430 19 Berry JW, Hou F. Immigrant Acculturation and Wellbeing in Canada. *Can Psychol*  
8 431 2016;**57**:254–64.  
9 432 20 Rumbaut R. Children of Immigrants and Their Achievement : The Role of Family ,  
10 433 Acculturation , Social Class , *Addressing Achiev gap Theory informing Pract*  
11 434 2005;**23–59**:1–22.  
12 435 21 Bui HN. Racial and ethnic differences in the immigrant paradox in substance use.  
13 436 *J Immigr Minor Heal* 2013;**15**:866–81. doi:10.1007/s10903-012-9670-y  
14 437 22 Charles CZ. *Won't you be my neighbor: Race, class, and residence in Los Angeles*.  
15 438 Russell Sage Foundation 2006.  
16 439 23 Duffin E. Number of recent immigrants in Saskatchewan from 2001 to 2020.  
17 440 Statista. 2019. [https://www.statista.com/statistics/609178/number-of-immigrants-](https://www.statista.com/statistics/609178/number-of-immigrants-in-saskatchewan/)  
18 441 [in-saskatchewan/](https://www.statista.com/statistics/609178/number-of-immigrants-in-saskatchewan/)  
19 442 24 Gordon MM. *Assimilation in American life: The role of race, religion, and*  
20 443 *national origins*. Oxford University Press on Demand 1964.  
21 444 25 McCann M. *Drug Knowledge, Attitudes, Beliefs and Use Among Chinese*  
22 445 *International Students on the West Coast of the US and Canada*. Saint Mary's  
23 446 College of California 2018.  
24 447 26 Moloney M, Hunt G, Evans K. Asian American identity and drug consumption:  
25 448 From acculturation to normalization. *J Ethn Subst Abuse* 2008;**7**:376–403.  
26 449 doi:10.1080/15332640802508168  
27 450 27 Borges G, Medina-Mora ME, Breslau J, *et al*. The effect of migration to the United  
28 451 States on substance use disorders among returned Mexican migrants and families  
29 452 of migrants. *Am J Public Health* 2007;**97**:1847–51.  
30 453 28 Robert AM, Gilkinson T. Mental health and well-being of recent immigrants in  
31 454 Canada: evidence from the longitudinal survey of immigrants to Canada. *Citizsh*  
32 455 *Immigr Canada* 2012;:1–  
33 456 33. [https://www.canada.ca/content/dam/ircc/migration/ircc/english/pdf/research-](https://www.canada.ca/content/dam/ircc/migration/ircc/english/pdf/research-stats/mental-health.pdf%0Ahttp://site.ebrary.com.ezproxy.library.dal.ca/lib/dal/docDetail.action?docID=10726283)  
34 457 [stats/mental-](https://www.canada.ca/content/dam/ircc/migration/ircc/english/pdf/research-stats/mental-health.pdf%0Ahttp://site.ebrary.com.ezproxy.library.dal.ca/lib/dal/docDetail.action?docID=10726283)  
35 458 [health.pdf%0Ahttp://site.ebrary.com.ezproxy.library.dal.ca/lib/dal/docDetail.action](https://www.canada.ca/content/dam/ircc/migration/ircc/english/pdf/research-stats/mental-health.pdf%0Ahttp://site.ebrary.com.ezproxy.library.dal.ca/lib/dal/docDetail.action?docID=10726283)  
36 459 [?docID=10726283](https://www.canada.ca/content/dam/ircc/migration/ircc/english/pdf/research-stats/mental-health.pdf%0Ahttp://site.ebrary.com.ezproxy.library.dal.ca/lib/dal/docDetail.action?docID=10726283)  
37 460 29 Hamilton HA, van der Maas M, Boak A, *et al*. Subjective Social Status, Immigrant  
38 461 Generation, and Cannabis and Alcohol Use Among Adolescents. *J Youth Adolesc*  
39 462 2014;**43**:1163–75. doi:10.1007/s10964-013-0054-y  
40 463 30 Burlew AK, Johnson CS, Flowers AM, *et al*. Neighborhood risk, parental  
41 464 supervision and the onset of substance use among African American adolescents. *J*  
42 465 *Child Fam Stud* 2009;**18**:680–9. doi:10.1007/s10826-009-9273-y  
43 466 31 Myers R, Chou C-P, SUSSMAN S, *et al*. Acculturation and Substance Use: Social  
44 467 Influence as a Mediator among Hispanic Alternative High School Youth. *NIH*  
45 468 *Public Access* 2009;**50**:164–79.  
46 469 32 Williams LR, Ayers S, Baldwin A, *et al*. Delaying youth substance-use initiation:  
47 470 A cluster randomized controlled trial of complementary youth and parenting  
48 471 interventions. *J Soc Social Work Res* 2015;**7**:177–200. doi:10.1086/685298

- 1  
2  
3 472 33 Delforterie MJ, Verweij KJH, Creemers HE, *et al.* Parental solicitation, parental  
4 473 control, child disclosure, and substance use: native and immigrant Dutch  
5 474 adolescents. *Ethn Heal* 2016;**21**:535–50. doi:10.1080/13557858.2015.1126562  
6 475 34 Giles AR, Darroch FE. The need for culturally safe physical activity promotion  
7 476 and programs. *Can J Public Heal* 2014;**105**:317–9. doi:10.17269/cjph.105.4439  
8 477 35 Curtis E, Jones R, Tipene-Leach D, *et al.* Why cultural safety rather than cultural  
9 478 competency is required to achieve health equity: A literature review and  
10 479 recommended definition. *Int J Equity Health* 2019;**18**:1–17. doi:10.1186/s12939-  
11 480 019-1082-3  
12 481 36 Daley DC. Family and social aspects of substance use disorders and treatment. *J*  
13 482 *Food Drug Anal* 2013;**21**:S73–6. doi:10.1016/j.jfda.2013.09.038  
14 483 37 Association AD. Position of the American Dietetic Association: individual-,  
15 484 family-, school-, and community-based interventions for pediatric overweight. *J*  
16 485 *Am Diet Assoc* 2006;**106**:925–45.  
17 486 38 Adams N. Using Community Engagement to Map Pathways of Opioid Use and  
18 487 Recovery. *J Community Health Nurs* 2020;**37**:1–8.  
19 488 doi:10.1080/07370016.2020.1693089  
20 489 39 Özdemir M, Koutakis N. Does promoting parents' negative attitudes to underage  
21 490 drinking reduce adolescents' drinking? The mediating process and moderators of  
22 491 the effects of the Örebro Prevention Programme. *Addiction* 2016;**111**:263–71.  
23 492 doi:10.1111/add.13177  
24 493 40 Trucco EM, Colder CR, Wieczorek WF. Vulnerability to peer influence: A  
25 494 moderated mediation study of early adolescent alcohol use initiation. *Addict Behav*  
26 495 2011;**36**:729–36. doi:10.1016/j.addbeh.2011.02.008  
27 496 41 Koning IM, Van Den Eijnden RJJM, Engels RCME, *et al.* Why target early  
28 497 adolescents and parents in alcohol prevention? The mediating effects of self-  
29 498 control, rules and attitudes about alcohol use. *Addiction* 2011;**106**:538–46.  
30 499 doi:10.1111/j.1360-0443.2010.03198.x  
31 500 42 Villagrana M, Lee SY. Parental Influence on Adolescent Cigarette, Alcohol and  
32 501 Marijuana Use: A Focus on Race/Ethnicity and Age. *Child Adolesc Soc Work J*  
33 502 2018;**35**:107–18. doi:10.1007/s10560-017-0518-0  
34 503 43 Slobodin O, de Jong JTVM. Family interventions in traumatized immigrants and  
35 504 refugees: A systematic review. *Transcult Psychiatry* 2015;**52**:723–42.  
36 505 doi:10.1177/1363461515588855  
37 506 44 Mays N, Roberts E, Popay J. Synthesising research evidence. In: Fulop N, Allen P,  
38 507 Clarke A, *et al.*, eds. *Studying the Organization and Delivery of Health Services:*  
39 508 *Research Methods*. London: : Routledge 2001. 188–220.  
40 509 doi:10.4324/9780203481981  
41 510 45 Simonds V, Wallerstein N, Duran B, *et al.* Community-based participatory  
42 511 research: Its role in future cancer research and public health practice. *Prev Chronic*  
43 512 *Dis* Published Online First: 2013. doi:10.5888/pcd10.120205  
44 513 46 Strand K, Marullo S, Cutforth N, *et al.* Principles of Best Practice for Community-  
45 514 Based Research. *Michigan J Community Serv Learn* 2003;**9**:5–  
46 515 15.<http://eric.ed.gov/?id=EJ671675>  
47 516 47 Arksey H, O'Malley L. Scoping studies: Towards a methodological framework.  
48 517 *Int J Soc Res Methodol Theory Pract* 2005;**8**:19–32.

- 1  
2  
3 518 doi:10.1080/1364557032000119616  
4 519 48 Maina G, Phaneuf T, Kennedy M, *et al.* School-based interventions for preventing  
5 520 substance use in indigenous children ages 7-13: A scoping review protocol. *BMJ*  
6 521 *Open* 2020;**10**:1–6. doi:10.1136/bmjopen-2019-034032  
7 522 49 Canadian Centre on Substance Use and Addiction (CCSA). Our Focus. Can. Cent.  
8 523 Subst. Use Addict. 2021.  
9 524 50 The Centre for Addiction and Mental Health (camh). About CAMH. Cent. Addict.  
10 525 Ment. Heal. <https://www.camh.ca/en/driving-change/about-camh>  
11 526 51 Canadian Agency for Drugs and Technologies in Health (CADTH). About  
12 527 CADTH. Can. Agency Drugs Technol. Heal. 2021.  
13 528 doi:<https://www.cadth.ca/about-cadth>  
14 529 52 Moher D, Liberati A, Tetzlaff J, *et al.* Preferred reporting items for systematic  
15 530 reviews and meta-analyses: The PRISMA statement. *PLoS Med* 2009;**6**.  
16 531 doi:10.1371/journal.pmed.1000097  
17 532 53 Stanton TK. New times demand new scholarship: Opportunities and challenges for  
18 533 civic engagement at research universities. *Educ Citizsh Soc Justice* 2008;**3**:19–42.  
19 534 doi:10.1177/1746197907086716  
20 535 54 Wallerstein NB, Duran B. Using Community-Based Participatory Research to  
21 536 Address Health Disparities. *Health Promot Pract* 2006;**7**:312–23.  
22 537 doi:10.1177/1524839906289376  
23 538 55 Vang ZM, Sigouin J, Flenon A, *et al.* Are immigrants healthier than native-born  
24 539 Canadians? A systematic review of the healthy immigrant effect in Canada. *Ethn*  
25 540 *Heal* 2017;**22**:209–41. doi:10.1080/13557858.2016.1246518  
26 541 56 Hudon T. Women in Canada : A Gender-based Statistical Report Immigrant  
27 542 Women. *Women in Canada* 2015;**7th Editio**:1–39.  
28 543 57 Statistics Canada. Data tables, 2016 Census. Stat. Canada. 2019.  
29 544 58 Beiser M, Hou F, Hyman I, *et al.* Poverty, family process, and the mental health of  
30 545 immigrant children in Canada. *Am J Public Health* 2002;**92**:220–7.  
31 546 doi:10.2105/AJPH.92.2.220  
32 547 59 Singh S, McBride K, Kak V. Role of Social Support in Examining Acculturative  
33 548 Stress and Psychological Distress Among Asian American Immigrants and Three  
34 549 Sub-groups: Results from NLAAS. *J Immigr Minor Heal* 2015;**17**:1597–606.  
35 550 doi:10.1007/s10903-015-0213-1  
36 551 60 BORNSTEIN M, BOHR Y. Immigration, Acculturation and Parenting. *Encycl*  
37 552 *Early Child Dev* 2011;:1–8.[http://www.child-](http://www.child-encyclopedia.com/documents/Bornstein-BohrANGxp1.pdf)  
38 553 [encyclopedia.com/documents/Bornstein-BohrANGxp1.pdf](http://www.child-encyclopedia.com/documents/Bornstein-BohrANGxp1.pdf)  
39 554 61 Mundt MP. The impact of peer social networks on adolescent alcohol use  
40 555 initiation. *Acad Pediatr* 2011;**11**:414–21. doi:10.1016/j.acap.2011.05.005  
41 556 62 Wen X, Shenassa ED. Interaction between parenting and neighborhood quality on  
42 557 the risk of adolescent regular smoking. *Nicotine Tob Res* 2012;**14**:313–22.  
43 558 doi:10.1093/ntr/ntr215  
44 559 63 Enriquez LE. “Because we feel the pressure and we also feel the support”:  
45 560 Examining the educational success of undocumented immigrant Latina/o students.  
46 561 *Harv Educ Rev* 2011;**81**:476–99. doi:10.17763/haer.81.3.w7k703q050143762  
47 562 64 Jaffe-Walter R, Lee SJ. “To Trust in My Root and to Take That to Go Forward”:  
48 563 Supporting College Access for Immigrant Youth in the Global City. *Anthropol*

1  
2  
3 564  
4 565  
5 566  
6 567  
7  
8  
9  
10  
11  
12  
13  
14  
15  
16  
17  
18  
19  
20  
21  
22  
23  
24  
25  
26  
27  
28  
29  
30  
31  
32  
33  
34  
35  
36  
37  
38  
39  
40  
41  
42  
43  
44  
45  
46  
47  
48  
49  
50  
51  
52  
53  
54  
55  
56  
57  
58  
59  
60

*Educ Q* 2011;**42**:281–96. doi:10.1111/j.1548-1492.2011.01132.x

For peer review only

**APPENDIX 1: SEARCHING KEYWORDS FOR THE SCOPING REVIEW**

| <b>Family</b> | <b>Youth</b> | <b>Prevention</b> | <b>Immigration</b> | <b>Substance Use</b>        |
|---------------|--------------|-------------------|--------------------|-----------------------------|
| Family        | adolescent   | Prevent*          | Immigrat*          | Substance-related disorders |
| Families      | Teen*        |                   | Alien*             |                             |
| Familial      | Youth*       |                   | Emigrant*          | Chemical dependence*        |
| Mother*       | Adolescen*   |                   | Foreigner*         |                             |
| Parent*       |              |                   | Immigrant*         | Drug abuse                  |
| Sibling*      |              |                   | Refugee*           | Drug addiction              |
| Grandparent*  |              |                   | migrant*           |                             |
| Elder*        |              |                   | asylum             | Drug dependence             |
| Aunt*         |              |                   | newcomer*          | Drug use disorder*          |
| Uncle*        |              |                   |                    |                             |
| Cousin*       |              |                   |                    | Substance abuse*            |
| Brother*      |              |                   |                    |                             |
| Sister*       |              |                   |                    | Pharmaceutical misuse       |
|               |              |                   |                    | Substance addict*           |
|               |              |                   |                    | Substance dependen*         |
|               |              |                   |                    | Substance use               |
|               |              |                   |                    | Cannabis                    |
|               |              |                   |                    | Marijuana                   |
|               |              |                   |                    | Cocaine                     |
|               |              |                   |                    | Cigarette*                  |
|               |              |                   |                    | Smok*                       |
|               |              |                   |                    | Alcohol                     |
|               |              |                   |                    | Drug use                    |
|               |              |                   |                    | Meth*                       |
|               |              |                   |                    | Methamphetamine             |

## Preferred Reporting Items for Systematic reviews and Meta-Analyses extension for Scoping Reviews (PRISMA-ScR) Checklist

| SECTION                                               | ITEM | PRISMA-ScR CHECKLIST ITEM                                                                                                                                                                                                                                                                                  | REPORTED ON PAGE # |
|-------------------------------------------------------|------|------------------------------------------------------------------------------------------------------------------------------------------------------------------------------------------------------------------------------------------------------------------------------------------------------------|--------------------|
| <b>TITLE</b>                                          |      |                                                                                                                                                                                                                                                                                                            |                    |
| Title                                                 | 1    | Identify the report as a scoping review.                                                                                                                                                                                                                                                                   | 2                  |
| <b>ABSTRACT</b>                                       |      |                                                                                                                                                                                                                                                                                                            |                    |
| Structured summary                                    | 2    | Provide a structured summary that includes (as applicable): background, objectives, eligibility criteria, sources of evidence, charting methods, results, and conclusions that relate to the review questions and objectives.                                                                              | 2                  |
| <b>INTRODUCTION</b>                                   |      |                                                                                                                                                                                                                                                                                                            |                    |
| Rationale                                             | 3    | Describe the rationale for the review in the context of what is already known. Explain why the review questions/objectives lend themselves to a scoping review approach.                                                                                                                                   | 3/4/5              |
| Objectives                                            | 4    | Provide an explicit statement of the questions and objectives being addressed with reference to their key elements (e.g., population or participants, concepts, and context) or other relevant key elements used to conceptualize the review questions and/or objectives.                                  | 5                  |
| <b>METHODS</b>                                        |      |                                                                                                                                                                                                                                                                                                            |                    |
| Protocol and registration                             | 5    | Indicate whether a review protocol exists; state if and where it can be accessed (e.g., a Web address); and if available, provide registration information, including the registration number.                                                                                                             | N/A                |
| Eligibility criteria                                  | 6    | Specify characteristics of the sources of evidence used as eligibility criteria (e.g., years considered, language, and publication status), and provide a rationale.                                                                                                                                       | 6                  |
| Information sources*                                  | 7    | Describe all information sources in the search (e.g., databases with dates of coverage and contact with authors to identify additional sources), as well as the date the most recent search was executed.                                                                                                  | 5/6                |
| Search                                                | 8    | Present the full electronic search strategy for at least 1 database, including any limits used, such that it could be repeated.                                                                                                                                                                            | 5/6; Appendix 1    |
| Selection of sources of evidence†                     | 9    | State the process for selecting sources of evidence (i.e., screening and eligibility) included in the scoping review.                                                                                                                                                                                      | 6                  |
| Data charting process‡                                | 10   | Describe the methods of charting data from the included sources of evidence (e.g., calibrated forms or forms that have been tested by the team before their use, and whether data charting was done independently or in duplicate) and any processes for obtaining and confirming data from investigators. | 6                  |
| Data items                                            | 11   | List and define all variables for which data were sought and any assumptions and simplifications made.                                                                                                                                                                                                     | 5/6                |
| Critical appraisal of individual sources of evidence§ | 12   | If done, provide a rationale for conducting a critical appraisal of included sources of evidence; describe the methods used and how this information was used in any data synthesis (if appropriate).                                                                                                      | N/A                |

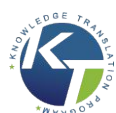

| SECTION                                       | ITEM | PRISMA-ScR CHECKLIST ITEM                                                                                                                                                                       | REPORTED ON PAGE # |
|-----------------------------------------------|------|-------------------------------------------------------------------------------------------------------------------------------------------------------------------------------------------------|--------------------|
| Synthesis of results                          | 13   | Describe the methods of handling and summarizing the data that were charted.                                                                                                                    | 6/7                |
| <b>RESULTS</b>                                |      |                                                                                                                                                                                                 |                    |
| Selection of sources of evidence              | 14   | Give numbers of sources of evidence screened, assessed for eligibility, and included in the review, with reasons for exclusions at each stage, ideally using a flow diagram.                    | N/A                |
| Characteristics of sources of evidence        | 15   | For each source of evidence, present characteristics for which data were charted and provide the citations.                                                                                     | N/A                |
| Critical appraisal within sources of evidence | 16   | If done, present data on critical appraisal of included sources of evidence (see item 12).                                                                                                      | N/A                |
| Results of individual sources of evidence     | 17   | For each included source of evidence, present the relevant data that were charted that relate to the review questions and objectives.                                                           | N/A                |
| Synthesis of results                          | 18   | Summarize and/or present the charting results as they relate to the review questions and objectives.                                                                                            | N/A                |
| <b>DISCUSSION</b>                             |      |                                                                                                                                                                                                 |                    |
| Summary of evidence                           | 19   | Summarize the main results (including an overview of concepts, themes, and types of evidence available), link to the review questions and objectives, and consider the relevance to key groups. | N/A                |
| Limitations                                   | 20   | Discuss the limitations of the scoping review process.                                                                                                                                          | 1-2                |
| Conclusions                                   | 21   | Provide a general interpretation of the results with respect to the review questions and objectives, as well as potential implications and/or next steps.                                       | N/A                |
| <b>FUNDING</b>                                |      |                                                                                                                                                                                                 |                    |
| Funding                                       | 22   | Describe sources of funding for the included sources of evidence, as well as sources of funding for the scoping review. Describe the role of the funders of the scoping review.                 | 8                  |

JBI = Joanna Briggs Institute; PRISMA-ScR = Preferred Reporting Items for Systematic reviews and Meta-Analyses extension for Scoping Reviews.

\* Where *sources of evidence* (see second footnote) are compiled from, such as bibliographic databases, social media platforms, and Web sites.

† A more inclusive/heterogeneous term used to account for the different types of evidence or data sources (e.g., quantitative and/or qualitative research, expert opinion, and policy documents) that may be eligible in a scoping review as opposed to only studies. This is not to be confused with *information sources* (see first footnote).

‡ The frameworks by Arksey and O'Malley (6) and Levac and colleagues (7) and the JBI guidance (4, 5) refer to the process of data extraction in a scoping review as data charting.

§ The process of systematically examining research evidence to assess its validity, results, and relevance before using it to inform a decision. This term is used for items 12 and 19 instead of "risk of bias" (which is more applicable to systematic reviews of interventions) to include and acknowledge the various sources of evidence that may be used in a scoping review (e.g., quantitative and/or qualitative research, expert opinion, and policy document).

From: Tricco AC, Lillie E, Zarin W, O'Brien KK, Colquhoun H, Levac D, et al. PRISMA Extension for Scoping Reviews (PRISMA-ScR): Checklist and Explanation. *Ann Intern Med.* 2018;169:467–473. doi: 10.7326/M18-0850.

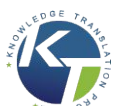

St. Michael's

Inspired Care.  
Inspiring Science.

For peer review only - <http://bmjopen.bmj.com/site/about/guidelines.xhtml>
