# Supplementary material for: Exploring family based immigrant youth substance use prevention programmes: a scoping review protocol
Source: PubMed Central journal article supplement — BMJ Open. 2021 May 26;11(5):e046766. doi: 10.1136/bmjopen-2020-046766 (PMC8160161; doi:10.1136/bmjopen-2020-046766), 2021-05-26
Supplement: bmjopen-2020-046766supp001.pdf [file bmjopen-2020-046766supp001.pdf]

**APPENDIX 1: SEARCHING KEYWORDS FOR THE SCOPING REVIEW**

| <b>Family</b> | <b>Youth</b> | <b>Prevention</b> | <b>Immigration</b> | <b>Substance Use</b>        |
|---------------|--------------|-------------------|--------------------|-----------------------------|
| Family        | adolescent   | Prevent*          | Immigrat*          | Substance-related disorders |
| Families      | Teen*        |                   | Alien*             |                             |
| Familial      | Youth*       |                   | Emigrant*          | Chemical dependence*        |
| Mother*       | Adolescen*   |                   | Foreigner*         |                             |
| Parent*       |              |                   | Immigrant*         | Drug abuse                  |
| Sibling*      |              |                   | Refugee*           | Drug addiction              |
| Grandparent*  |              |                   | migrant*           | Drug dependence             |
| Elder*        |              |                   | asylum             |                             |
| Aunt*         |              |                   | newcomer*          | Drug use disorder*          |
| Uncle*        |              |                   |                    |                             |
| Cousin*       |              |                   |                    | Substance abuse*            |
| Brother*      |              |                   |                    | Pharmaceutical misuse       |
| Sister*       |              |                   |                    | Substance addict*           |
|               |              |                   |                    | Substance dependen*         |
|               |              |                   |                    | Substance use               |
|               |              |                   |                    | Cannabis                    |
|               |              |                   |                    | Marijuana                   |
|               |              |                   |                    | Cocaine                     |
|               |              |                   |                    | Cigarette*                  |
|               |              |                   |                    | Smok*                       |
|               |              |                   |                    | Alcohol                     |
|               |              |                   |                    | Drug use                    |
|               |              |                   |                    | Meth*                       |
|               |              |                   |                    | Methamphetamine             |
